# Supplementary material for: Smart composite hydrogel with pH-, ionic strength- and temperature-induced actuation
Source: Royal Society of Chemistry journal article supplement (doi:10.1039/c8sm01728j), 2018-01-01
Supplement: c8sm01728j9.pdf [file c8sm01728j9.pdf]

Supporting information

for

# Smart Composite Hydrogel with pH-, Ionic strength- and Temperature-induced Actuation

by

Jiaojiao Shang and Patrick Theato

## 1. Determination of the parameters for the preparation of hydrogel

**Table S1.** The water content of the prepared hydrogels

| Prepared Hydrogels   | PNIPAm hydrogel | PAA hydrogel | Composite hydrogel (g) | PNIPAm/PAA composite hydrogel (l) | Bilayer hydrogel (n) |
|----------------------|-----------------|--------------|------------------------|-----------------------------------|----------------------|
| Water contents (wt%) | 617±51          | 642±43       | 478±37                 | 189±23                            | 278±32               |

The water contents were calculated as the equation: Water content (wt%)=[(W<sub>1</sub>-W<sub>0</sub>)/W<sub>0</sub>] $\times$ 100%, where W<sub>0</sub> and W<sub>1</sub> represent the weights of the dry and the water-swollen hydrogel, respectively. Each value is a mean of five determinations.

**Table S2.** The parameters of AA solution used to prepare optimum hydrogels

| AA solution |                            |                             |                              | Prepared homogeneous hydrogel |
|-------------|----------------------------|-----------------------------|------------------------------|-------------------------------|
| Volume (mL) | Concentration of AA (wt %) | Concentration of MBA (wt %) | Concentration of V-50 (wt %) | Thickness (μm)                |
| 5           | 1.5                        | 0.6                         | 0.6                          | 873±15                        |
| 5           | 1.0                        | 0.6                         | 0.6                          | 467±18                        |
| 5           | 0.7                        | 0.6                         | 0.6                          | 403±8                         |
| 7.5         | 1.5                        | 1                           | 1                            | 1343±11                       |
| 7.5         | 1.0                        | 1                           | 1                            | 920±15                        |
| 7.5         | 0.7                        | 1                           | 1                            | 714±9                         |
| 10          | 1.5                        | 1                           | 1                            | 1990±7                        |
| 10          | 1.0                        | 1                           | 1                            | 1340±11                       |
| 10          | 0.7                        | 1                           | 1                            | 1050±13                       |
| 7.5         | 1.5                        | 2                           | 2                            | 1256±8                        |
| 7.5         | 1.0                        | 2                           | 2                            | 893±15                        |
| 7.5         | 0.7                        | 2                           | 2                            | 642±14                        |

## 2. Demonstration of the responsiveness of homogeneous PAA hydrogel

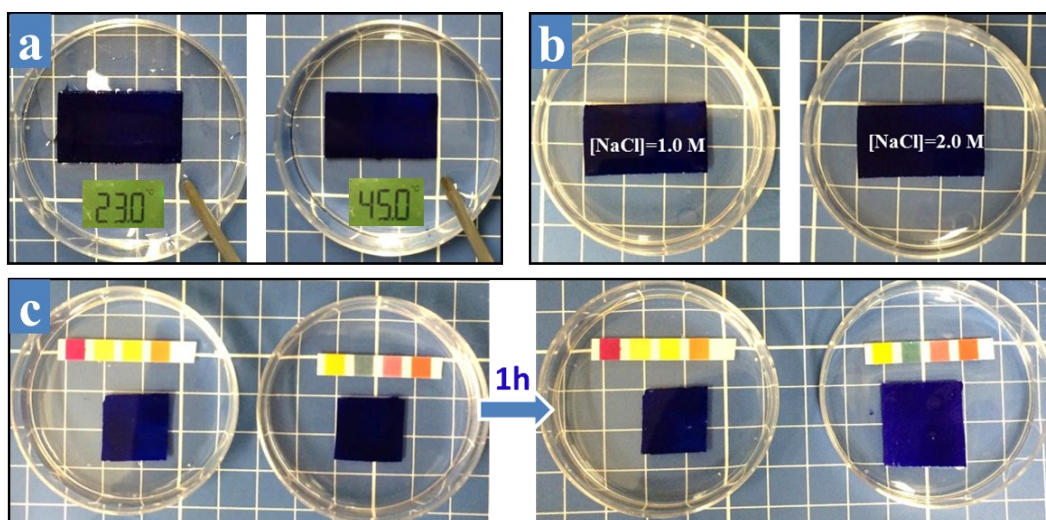

**Figure S1.** Photo images of blue dyed PAA hydrogel: immersing hydrogel into solution with different temperature (a), concentration of NaCl (b) and pH of 2 and 11 (c).

## 3. Demonstration of the responsiveness of homogeneous PNIPAm hydrogel

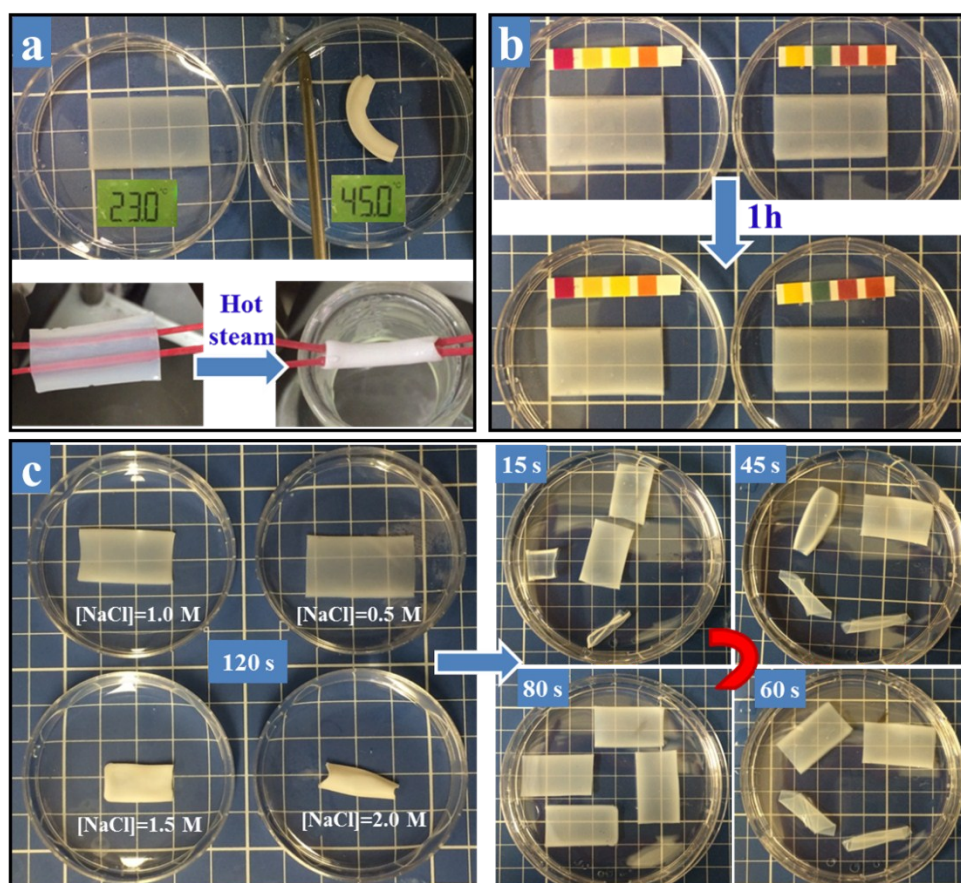

**Figure S2.** Photographs of homogeneous PNIPAm hydrogel before and after stimulations at 45°C and hot steam (a), variations of pH (b) and Ionic strength (c).
